# Supplementary material for: Generation of a new thermo-sensitive genic male sterile rice line by targeted mutagenesis of TMS5 gene through CRISPR/Cas9 system
Source: PubMed Central journal article supplement (PMC6425558; doi:10.1186/s12870-019-1715-0), 2019-03-20
Supplement: 12870_2019_1715_MOESM1_ESM.pdf [file 12870_2019_1715_MOESM1_ESM.pdf]

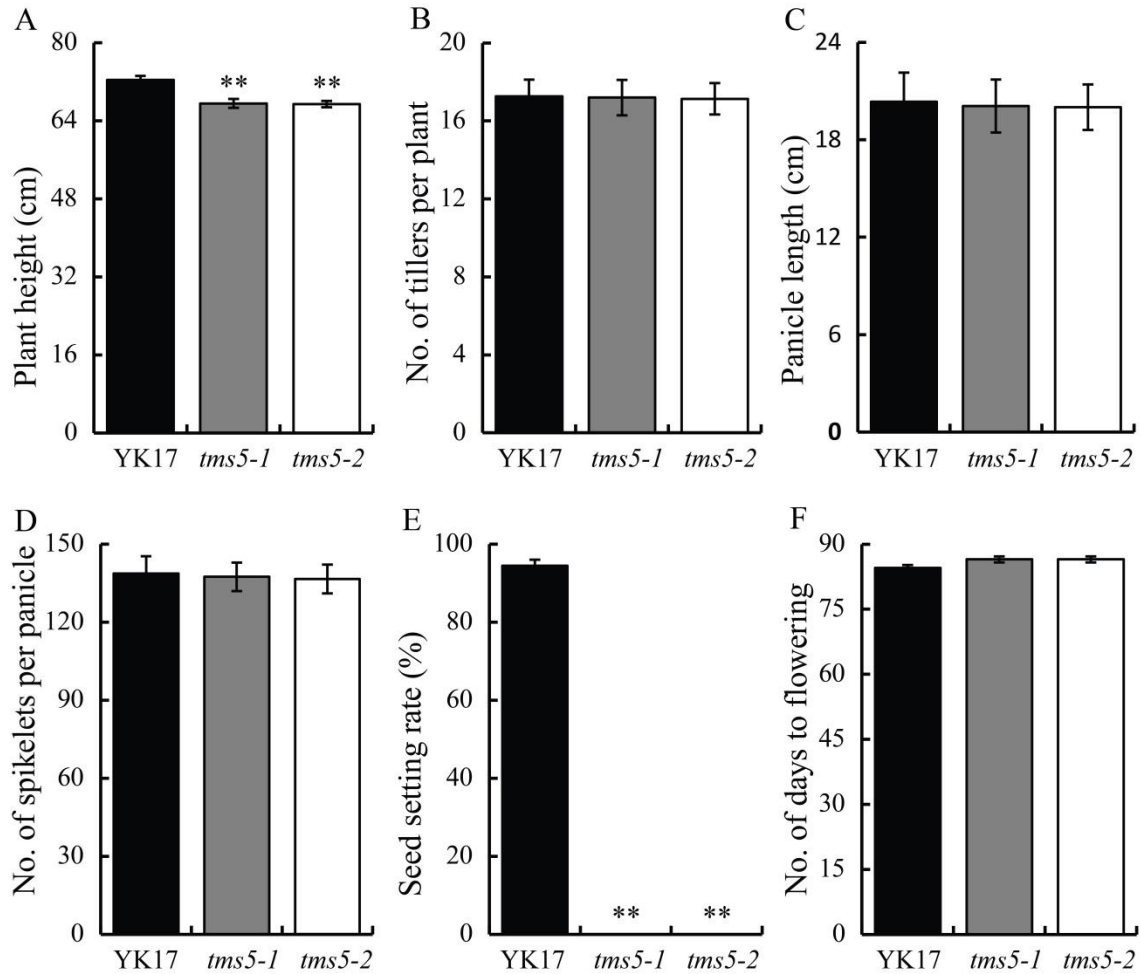

**Figure S1. Agronomic performance of cv. YK17 and T<sub>2</sub> generation *tms5-1* and *tms5-2* mutants grown during a normal growing season.** (A) Plant height. (B) Number of tillers per plant. (C) Panicle length (cm). (D) Number of spikelets per panicle. (E) Grain set. (F) Number of days to flowering. Values shown in the form mean  $\pm$  SD (A-E:  $n=16$ , F:  $n=2$ ). Asterisks (\*  $P < 0.05$ ; \*\*  $P < 0.01$ ) indicate statistically significant differences between the mutant and cv. YK17 as determined by a student's  $t$ -test.

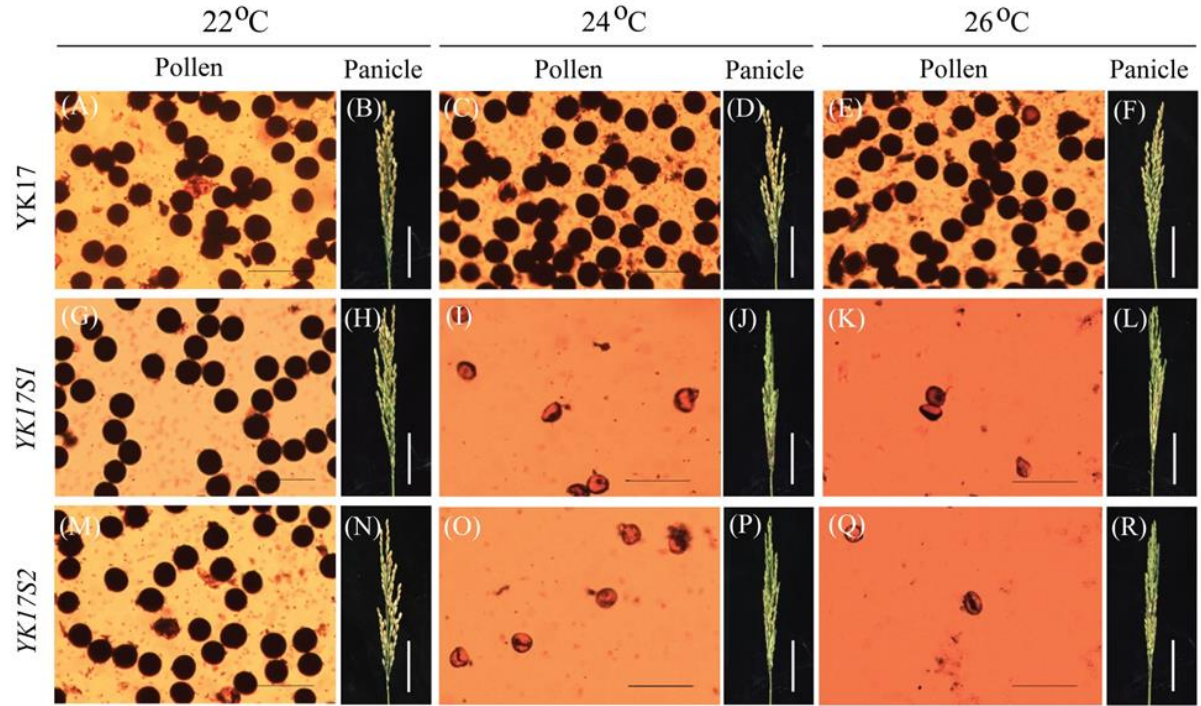

**Figure S2. Pollen fertility and grain set of cv. YK17 and the T<sub>3</sub> generation mutants (YK17S1 and YK17S2) plants grown under various temperature regimes. (A-F) cv. YK17, (G-L) YK17S1, (M-R) YK17S2 exposed to 22 °C, 24 °C or 26 °C. Bars in (A, C, E, G, I, K, M, O, Q): 100 μm; in (B, D, F, H, J, L, N, P, R): 5 cm.**

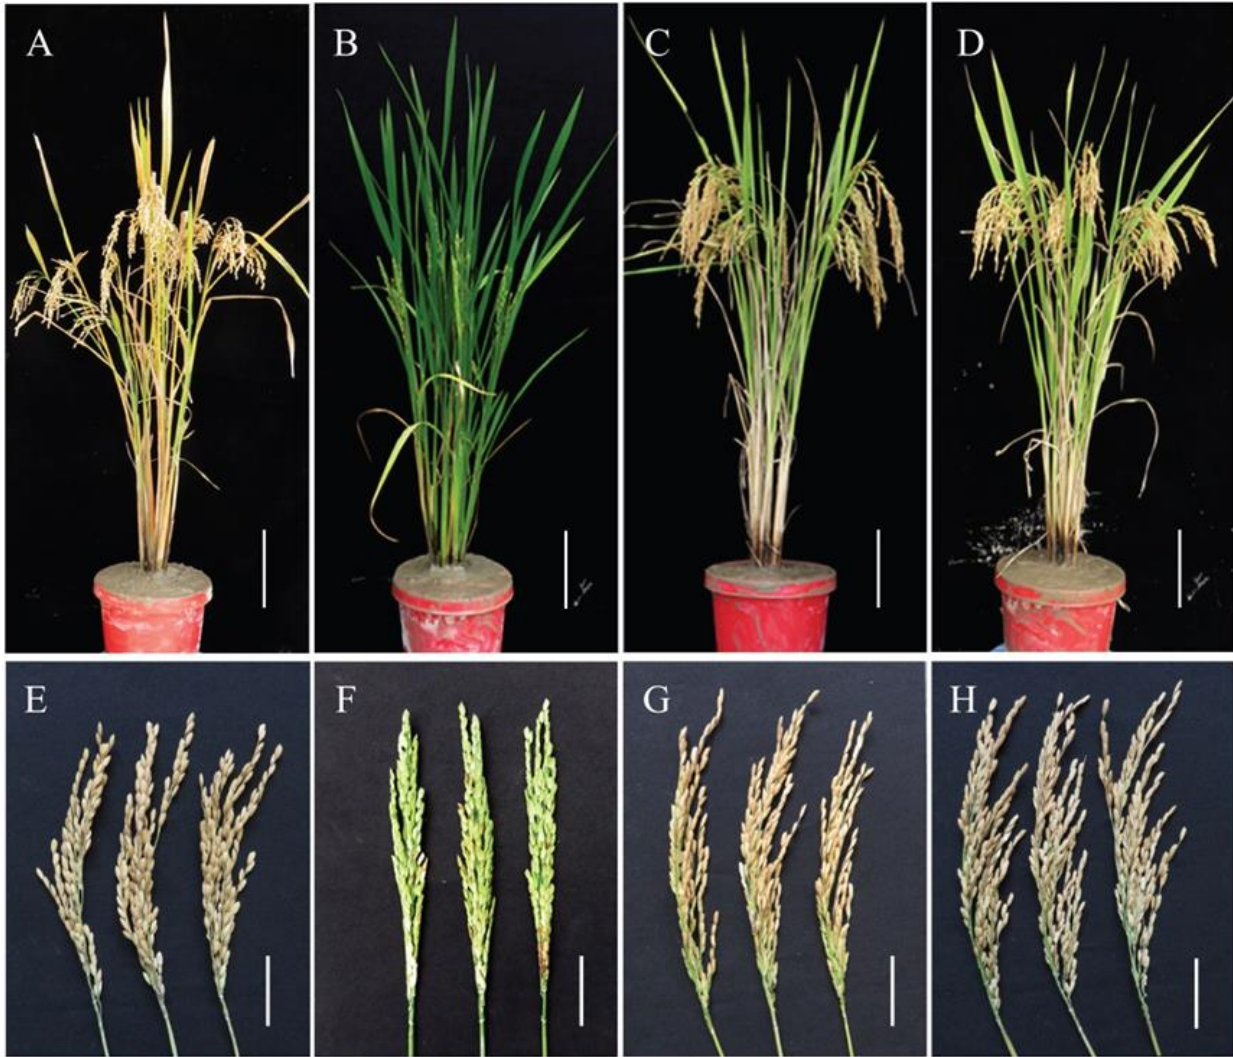

**Figure S3. Phenotype of cv. YK17, YK17S1, R106 and the F<sub>1</sub> hybrid of YK17S1 x R106.**

Appearance of the (A-D) whole plant and (E-H) panicle of cv. YK17, YK17S1, R106 and the F<sub>1</sub> hybrid of YK17S1 x R106 from left to right, respectively. Bars in A-D: 15 cm, E-H: 5 cm.

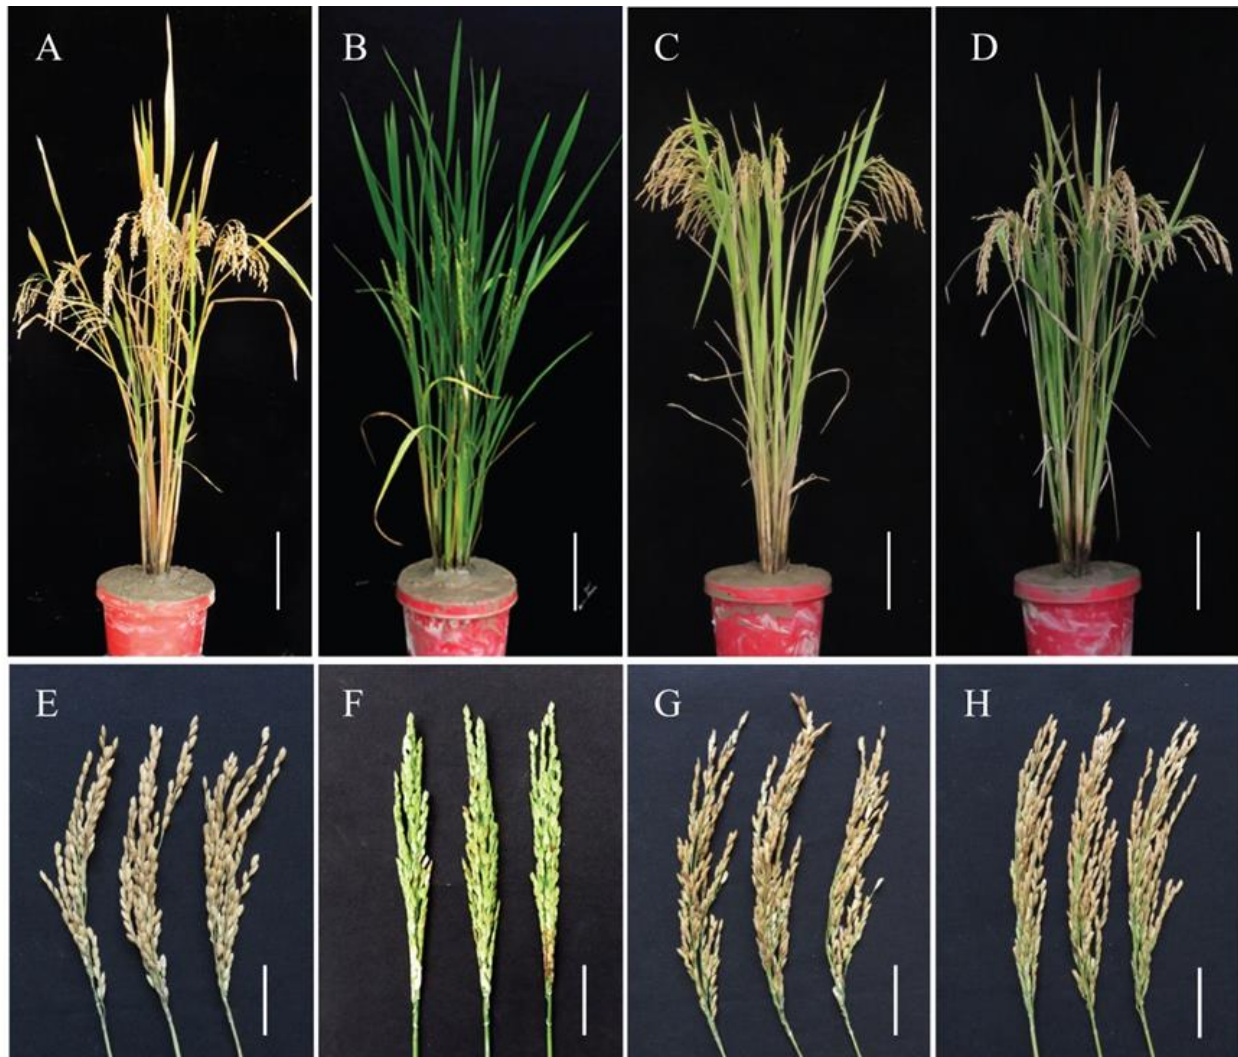

**Figure S4. Phenotype of cv. YK17, YK17S1, R207 and the F<sub>1</sub> hybrid of YK17S1 x R207.**

Appearance of the (A-D) whole plant and (E-H) panicle of cv. YK17, YK17S1, R207 and the F<sub>1</sub> hybrid of YK17S1 x R207 from left to right, respectively. Bars in A-D: 15 cm, E-H: 5 cm.



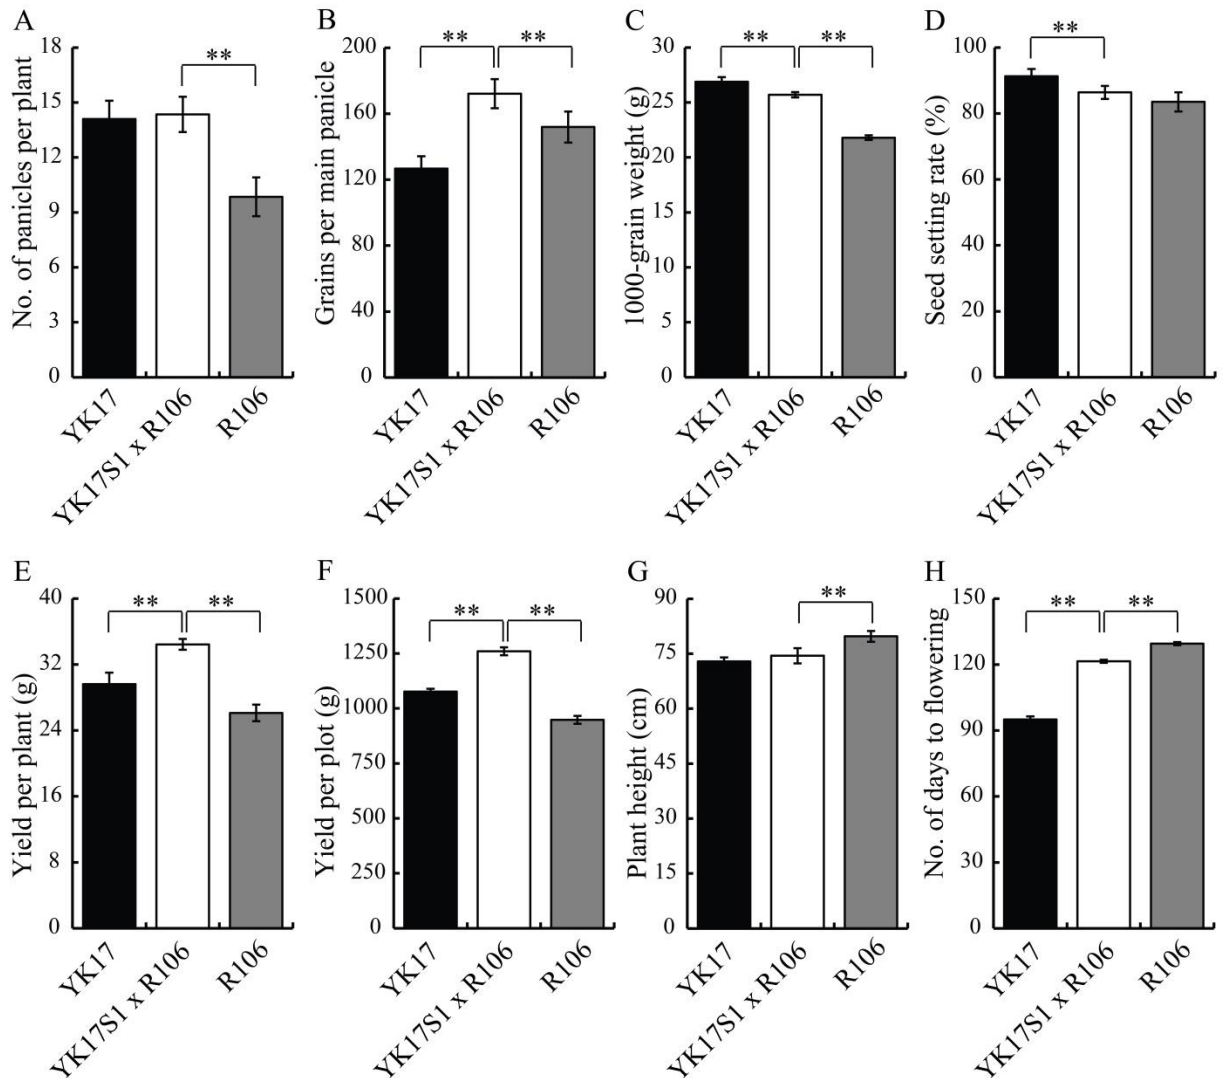

**Figure S5. Grain yield performance and yield components of cv. YK17, YK17S1, R106 and the F<sub>1</sub> hybrid YK17S1 x R106.** (A) Number of panicles per plant. (B) Number of grains set on the main panicle. (C) Thousand grain weight. (D) Grain set. (E) Yield per plant. (F) Yield per plot. (G) Plant height. (H) Number of days to flowering. Values shown in the form mean  $\pm$  SD (A, B, D, G:  $n=20$ ; C:  $n=4$ , E:  $n=6$ , F, H:  $n=2$ ). Asterisks (\*  $P < 0.05$ ; \*\*  $P < 0.01$ ) indicate statistically significant differences between the mean performances of either cv. YK17 and YK17S1 x R106, or R106 and YK17S1 x R106 as determined by a student's  $t$ -test.

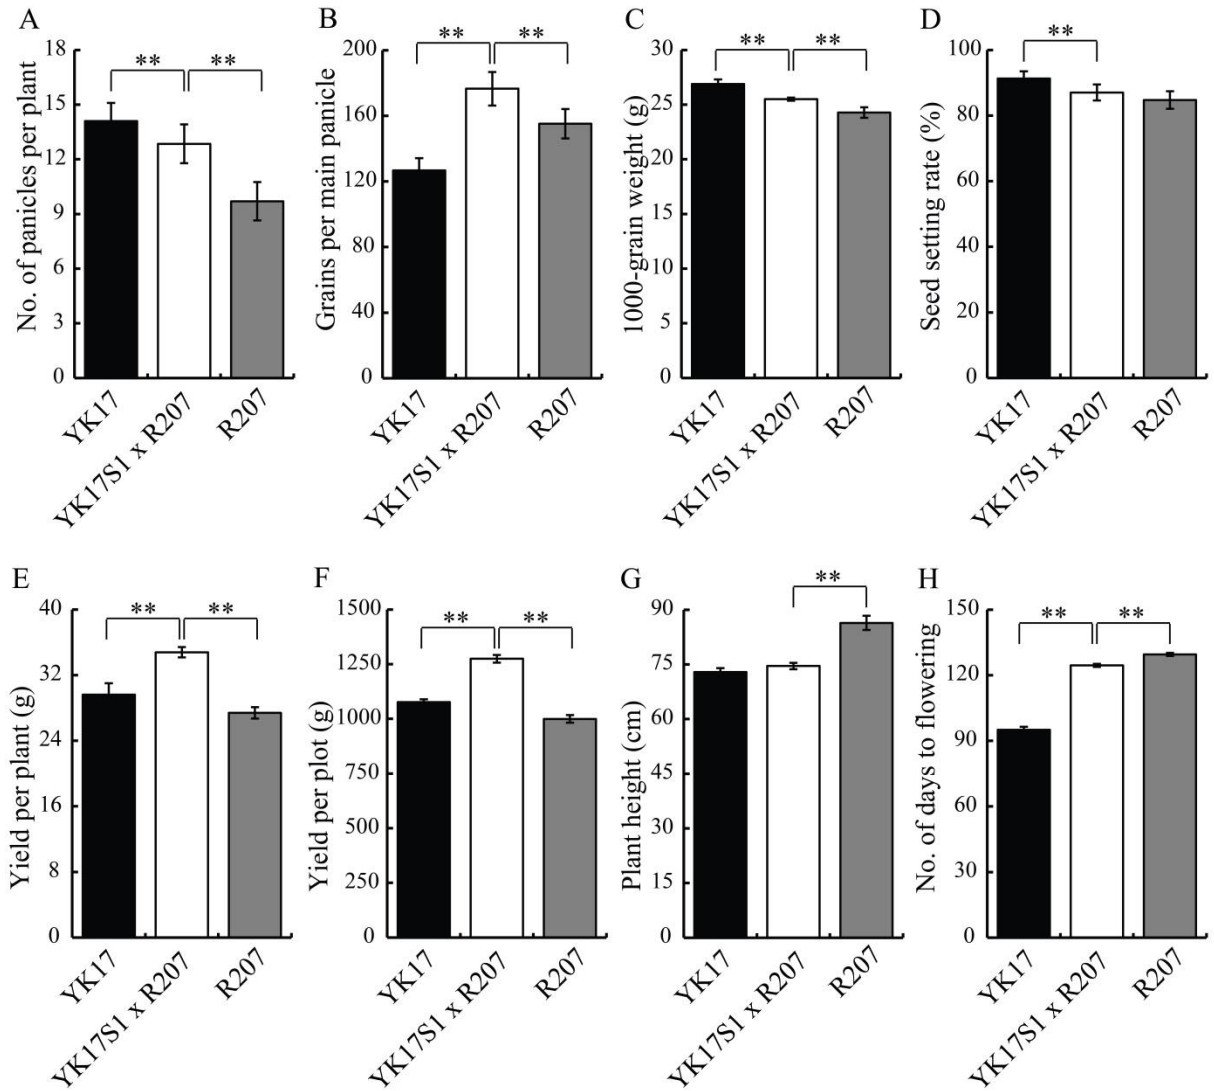

**Figure S6. Grain yield performance and yield components of cv. YK17, YK17S1, R207 and the F<sub>1</sub> hybrid YK17S1 x R207.** (A) Number of panicles per plant. (B) Number of grains set on the main panicle. (C) Thousand grain weight. (D) Grain set. (E) Yield per plant. (F) Yield per plot. (G) Plant height. (H) Number of days to flowering. Values shown in the form mean  $\pm$  SD (A, B, D, G:  $n=20$ ; C:  $n=4$ , E:  $n=6$ , F, H:  $n=2$ ). Asterisks (\*  $P < 0.05$ ; \*\*  $P < 0.01$ ) indicate statistically significant differences between the mean performances of either cv. YK17 and YK17S1 x R207, or R207 and YK17S1 x R207, as determined by a student's  $t$ -test.

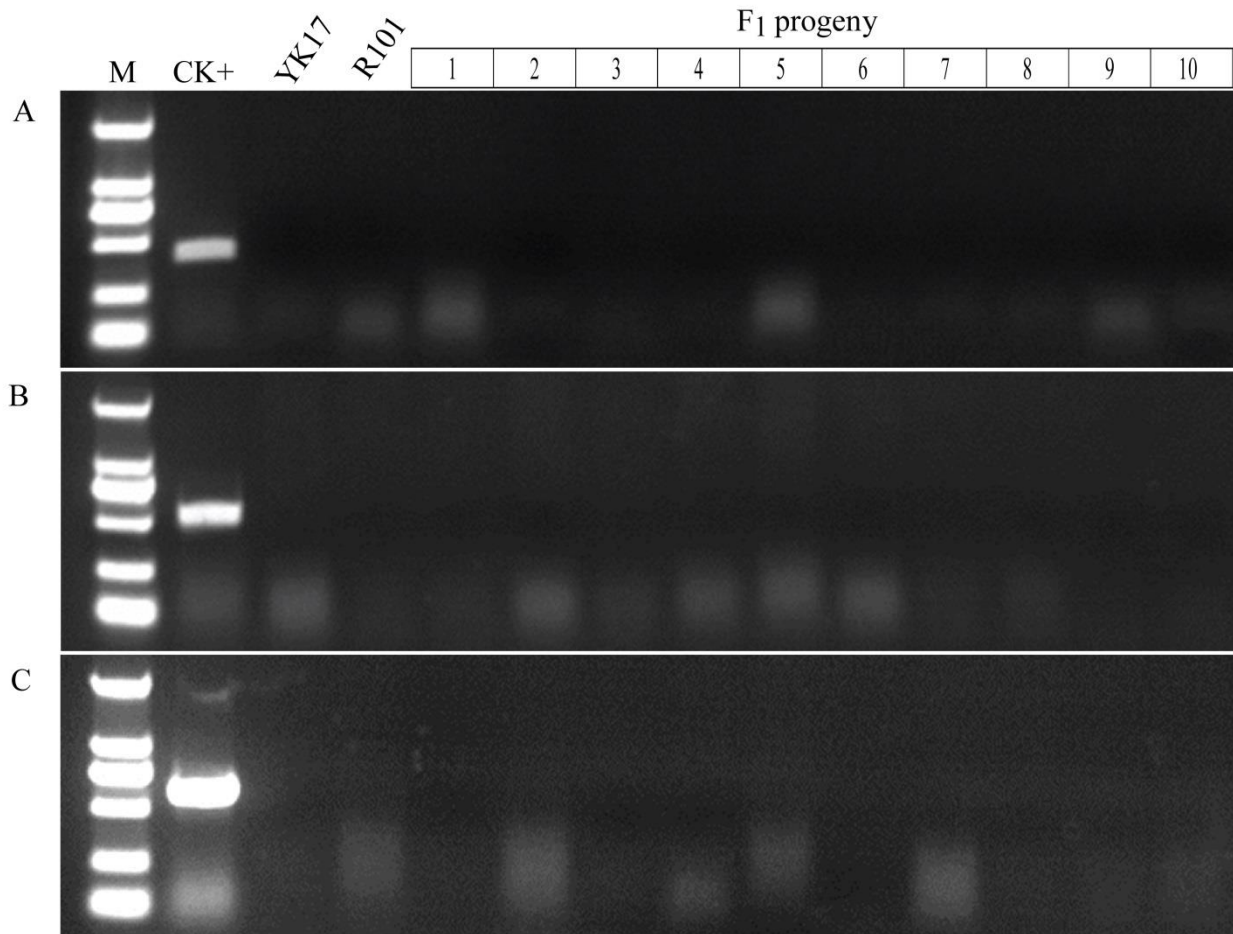

**Figure S7. PCR-based identification of T-DNA free in F<sub>1</sub> progenies of YK17S1 x R101 using primers directed at the *Cas9* (A), gRNA scaffold (B) and *hpt* (C) sequence. The gDNA of transgene positive plant was used as positive control (CK+), and cv. YK17 and R101 as the negative control. M: 2 kbp DNA ladder.**

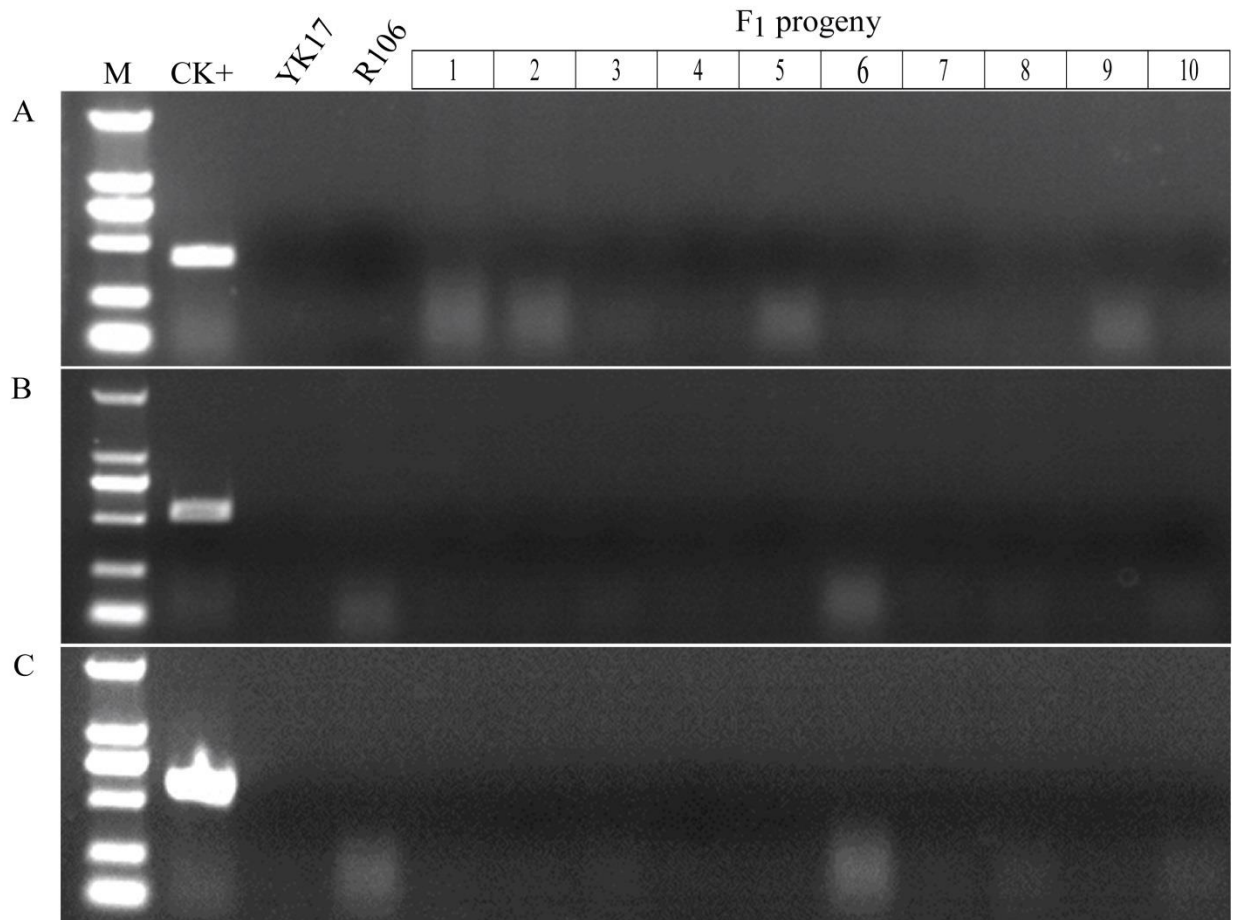

**Figure S8. PCR-based identification of T-DNA free in F<sub>1</sub> progenies of YK17S1 x R106 using primers directed at the *Cas9* (A), gRNA scaffold (B) and *hpt* (C) sequence.** The gDNA of transgene positive plant was used as positive control (CK+), and cv. YK17 and R106 as the negative control. M: 2 kbp DNA ladder.



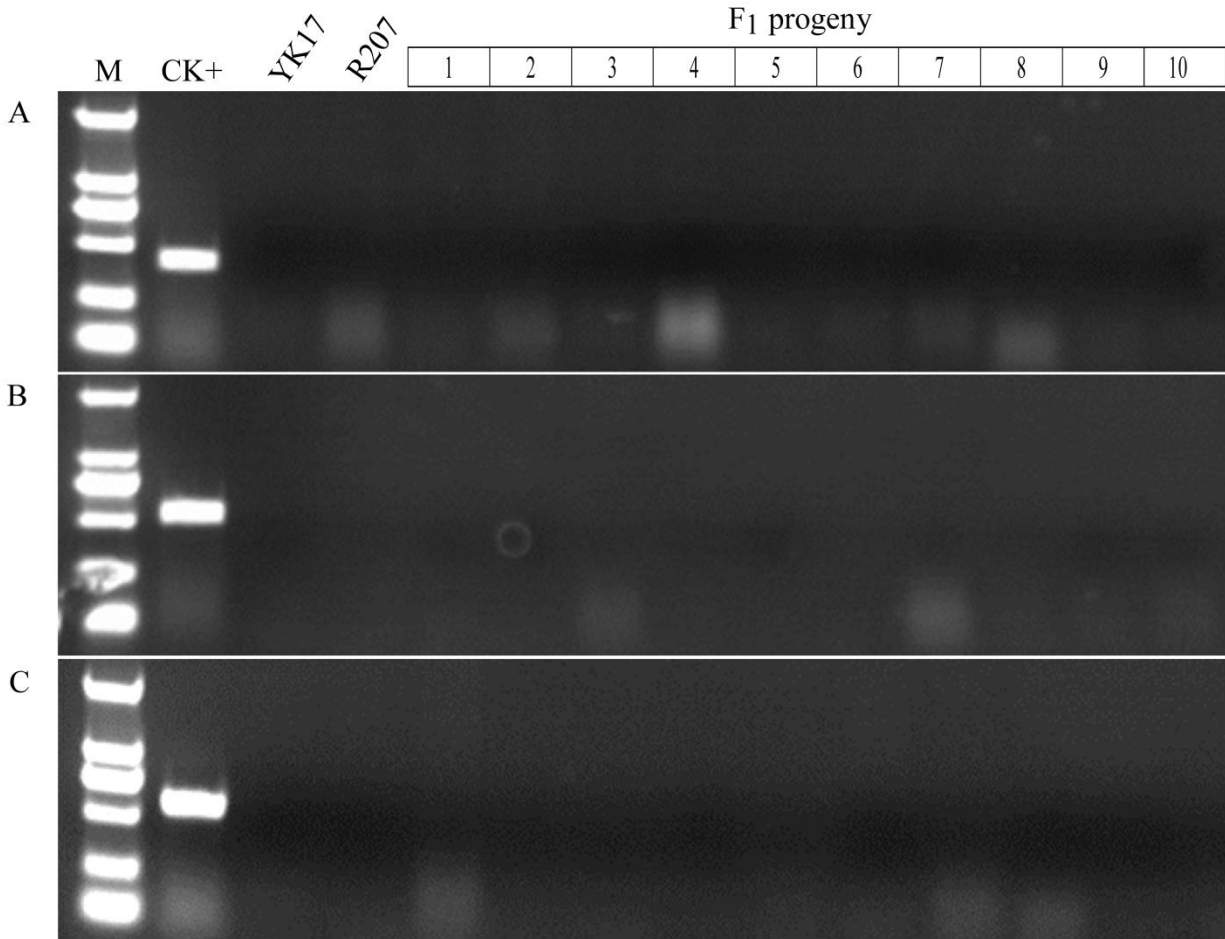

**Figure S9. PCR-based identification of T-DNA free in F<sub>1</sub> progenies of YK17S1 x R207 using primers directed at the *Cas9* (A), gRNA scaffold (B) and *hpt* (C) sequence.** The gDNA of transgene positive plant was used as positive control (CK+), and cv. YK17 and R207 as the negative control. M: 2 kbp DNA ladder.

**Table S1. Detection of mutations in potential off-target sites in T-DNA-free T<sub>1</sub> generation segregants.** Nucleotides corresponding to the protospacer adjacent motif motif in each target site are shown in red. Mismatches are shown in blue and matches in black.

| Target site | Name of the putative off-target site | Position of the target site | Sequence of the target site                 | Number of mismatching bases | Number of plant sequenced | Number of plant with mutations |
|-------------|--------------------------------------|-----------------------------|---------------------------------------------|-----------------------------|---------------------------|--------------------------------|
| <i>TMS5</i> |                                      | Chr2: 6362762-6362784       | CACCGTCGAGGGCTA<br>CCCCG <b>TGG</b>         |                             |                           |                                |
|             | TMS5-Chr1                            | Chr1: 2936471-2936493       | <b>TGGCTTCAC</b> GGGCTA<br>CCCCG <b>TGG</b> | 6                           | 5                         | 0                              |
|             | TMS5-Chr3                            | Chr3: 20468115-20468137     | <b>TGGCTTCAT</b> GGGCTA<br>CCCCG <b>TGG</b> | 6                           | 5                         | 0                              |
|             | TMS5-Chr8                            | Chr8: 8198377-8198399       | <b>TGTCTTCAC</b> GGGCTAC<br>CCCG <b>TGG</b> | 6                           | 5                         | 0                              |
|             | TMS5-Chr10                           | Chr10: 1035191-1035213      | <b>TGGCTTCAC</b> GGGCTA<br>CCCCG <b>TGG</b> | 6                           | 5                         | 0                              |

**Table S2. List of primers used in the present study.**

| <b>Primer name</b> | <b>Primer sequence (5'-3')</b> | <b>Purpose</b>    |
|--------------------|--------------------------------|-------------------|
| TMS5V-F            | CAGCACCGTCGAGGGCTACCCCG        | Vector constructs |
| TMS5V-R            | AACCGGGGTAGCCCTCGACGGTG        | Vector constructs |
| Sqprimer           | GATGAAGTGGACGGAAGGAAGGAG       | Target sequencing |
| Cas9-F             | TACTGAACTCCGAAATCTG            | Genotyping        |
| Cas9-R             | CAACGGTGGCTTACTCT              | Genotyping        |
| gRNA-F             | TGGTAGAAGTCGGAGATGT            | Genotyping        |
| gRNA-R             | CTTCCCTTTGTATTGCTG             | Genotyping        |
| HPT-F              | TGCTCCATACAAGCCAACC            | Genotyping        |
| HPT-R              | TGTCCTGCGGGTAAATAGC            | Genotyping        |
| TMS5S-F            | CCATCGTGCTTCGTGCCAAAA          | DNA sequencing    |
| TMS5S-R            | GCTCGTGCTCCTGACCAATCT          | DNA sequencing    |
| TMS5q-F            | GCTCAGCCACAACCTCGTC            | qRT-PCR           |
| TMS5q-R            | GCTGCTTGATCTCGCTCCC            | qRT-PCR           |
| Ubi-F              | GCTCCGTGGCGGTATCAT             | qRT-PCR           |
| Ubi-R              | CGGCAGTTGACAGCCCTAG            | qRT-PCR           |
| OsActin-F          | CAATCGTGAGAAGATGACCC           | cDNA-checking     |
| OsActin-R          | GTCCATCAGGAAGCTCGTAGC          | cDNA-checking     |
| Chr1-F             | ATGGACGGAGTTGCTGC              | DNA sequencing    |
| Chr1-R             | GTGGCGAATGCCTTTAGT             | DNA sequencing    |
| Chr3-F             | GCGAAACTATCAACCAGC             | DNA sequencing    |
| Chr3-R             | CGGATGTAATCTCAGAGGGA           | DNA sequencing    |
| Chr8-F             | GATTGTTACGAGGACGATGT           | DNA sequencing    |
| Chr8-R             | TGGATGCGGTGATAGCG              | DNA sequencing    |
| Chr10-F            | CCATTCACCAGACCGCTAC            | DNA sequencing    |
| Chr10-R            | CGGCTTTGGCATACTCATT            | DNA sequencing    |
